# Supplementary material
Source: publisher site journal article supplement (https://www.dovepress.com/get_supplementary_file.php?f=450468.docx)
Supplement: Supplementary file 1 [file get_supplementary_file.php]

**Supplementary table 1 The primers used in this article.**

| Gene | Forward | Reverse |
| --- | --- | --- |
| CD95 | 5′-GCTCAGTACGGAGTTGGGGAAGCTC-3′ | 5′-GCAGTCCCTAGCTTTCCTTTCACCTG-3′ |
| NOS2 | 5′-GCTCCGGCCGCAGAGAACTCAG-3′ | 5′-CTTGAGCTCTGGAAGGCTGA-3′ |
| CCL3 | 5′-GCAGGTCTCCACTGCTGCCCT-3′ | 5′-GCTTGGAGCACTGGCTGCTCG-3′ |
| CCL2 | 5′-TCTCGCCTCCAGCATGAAAG-3′ | 5′-CAGATCTCCTTGGCCACAATG-3′ |
| CD206 | 5′-GCCATGAGGCTACCCCTGCTCC-3′ | 5′-GCATAGAGAGTGATAGCAACCCAGTCCG-3′ |
| ARG2 | 5′-GCGGGCGGACGCTGGCG-3′ | 5′-GCAGCGGGACCATGCTCCACTC-3′ |
| GAPDH | 5′-CTCCTCTGACTTCAACAGCGACA-3′ | 5′-GCTGTAGCCAAATTCGTTGTCAT-3′ |

**Supplementary table 2 Sankey analysis of serum CXCL9 and tumor response according to RECIST v1.1.**

| Serum CXCL9 | Tumor response | | | Total | P value |
| --- | --- | --- | --- | --- | --- |
| PR | SD | PD |
| <ULC | 4 | 19 | 39 | 62  (50.4%) |  |
| ULC~2×ULC | 8 | 20 | 10 | 38  (30.9%) |  |
| >2×ULC | 16 | 6 | 1 | 23  (18.7%) |  |
| Total | 28  (22.8%) | 45  (36.6%) | 50  (40.7%) | 123  (100%) | <0.001 |

PD, progressive disease; PR, partial response; SD, stable disease; ULC, upper limit of cut-off value.

**Supplementary table 3 Pairwise analysis of progression free survival.**

|  |  | HR | CI | P value | Adjusted P value |
| --- | --- | --- | --- | --- | --- |
| <ULC | ULC~2×ULC | 0.49787 | 0.28103 - 0.88202 | 0.0276 | 0.0827 |
| <ULC | >2×ULC | 0.10364 | 0.052864 - 0.20319 | 0.0001 | 0.0003 |
| ULC~2×ULC | >2×ULC | 0.1813 | 0.065668 - 0.50054 | 0.0108 | 0.0323 |

CI, Confidence Interval; HR, Hazard Ratio; ULC, Upper limit of cut-off value.

**A B**

Post-treatment

Pre-treatment

Non-responder


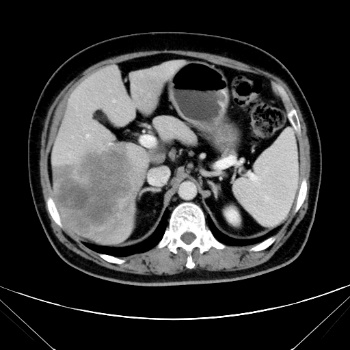


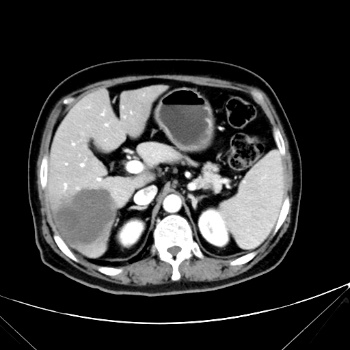


Responder


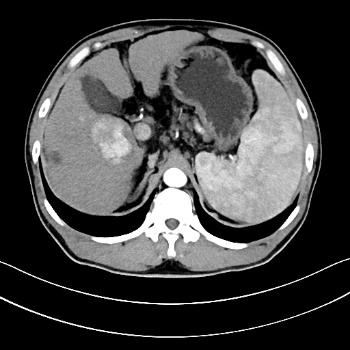

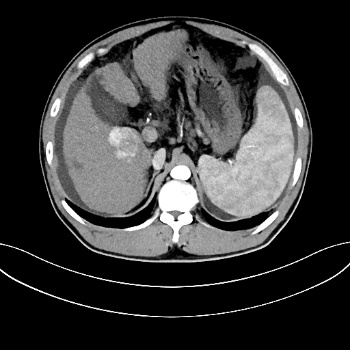


Figure S1. Representative image of abdominal contrast-enhanced CT from responders and non-responders.


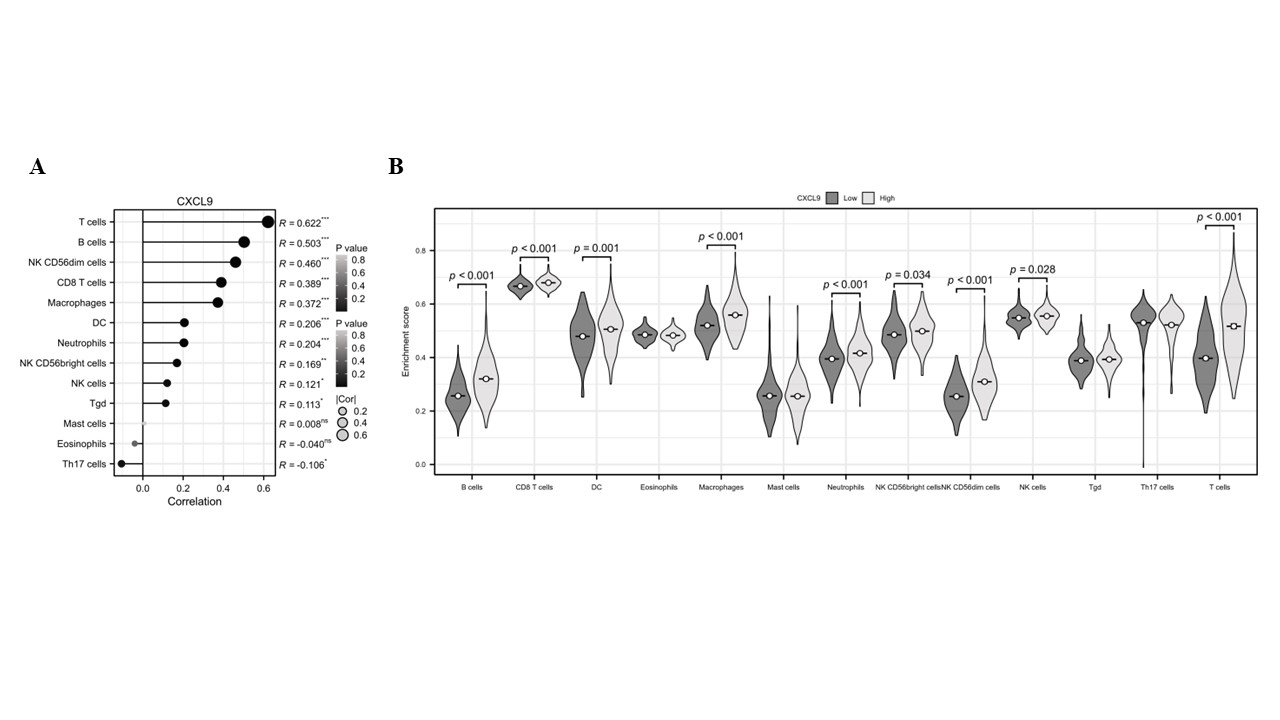


Figure S2. (A) Correlation analysis was performed between the immune infiltration matrix data in HCC tumor tissues from the high CXCL9 and low CXCL9 groups, ssGSEA algorithm was adopted. (B) Enrichment scores of infiltrations of different immune cells in HCC, ssGSEA algorithm was adopted. The data were obtained from the TCGA database (<https://portal.gdc.cancer.gov>).

**A**


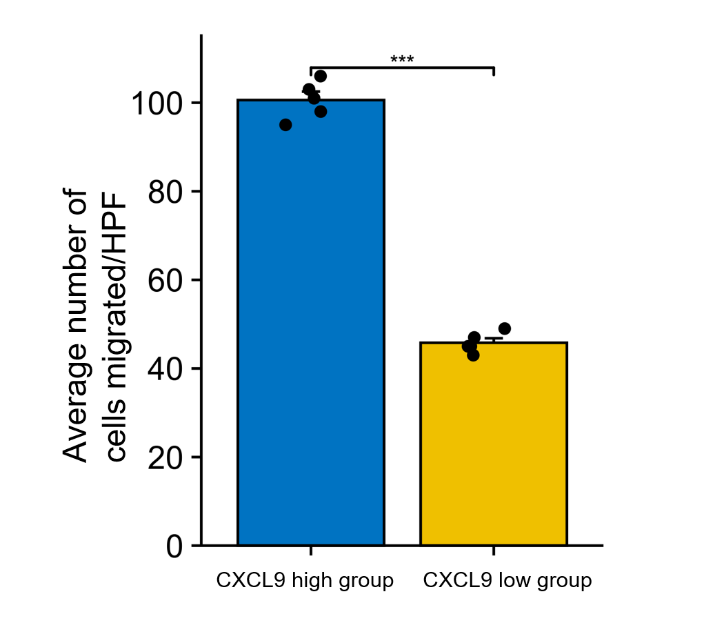


Figure S3. Neutrophils migration was analyzed in a Transwell plate (8 μm) after stimulation with upper-medium of the high or low CXCL9 secreting HCC. The number of cells that migrated to the bottom chamber was counted using a hemocytometer. ∗∗∗, P < 0.001; HPF, High Power Field.


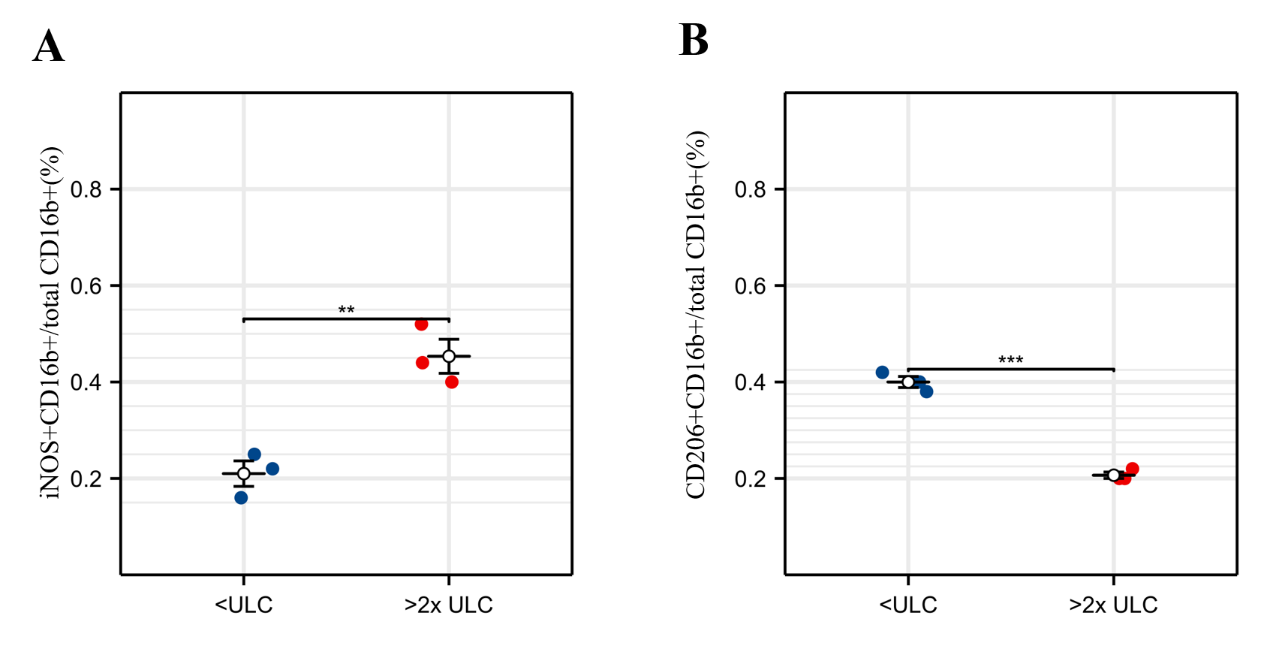


Figure S4. Analysis of CD206+CD16b+ cells, and iNOS+CD16b+ cells staining in tumor samples between serum CXCL9 high and low groups.
